# Supplementary material for: Anti-Inflammatory, Antioxidant Activities, and Phytochemical Characterization of Edible Plants Exerting Synergistic Effects in Human Gastric Epithelial Cells
Source: MDPI journal article supplement (doi:10.3390/antiox12030591), 2023-02-27
Supplement: s1 [file s1]

**Figure S1.** UPLC-ESI-HRMS/MS mass spectra of *Aframomum citratum* (C.Pereira) K.Schum **(A)**, *Dichrostachys glomerata* (Forssk.) Chiov. **(B)**, *Tetrapleura tetraptera* (Schum. and Thonn.) Taub **(C)** and *Xylopia parviflora* Spruce **(D)** extracts.

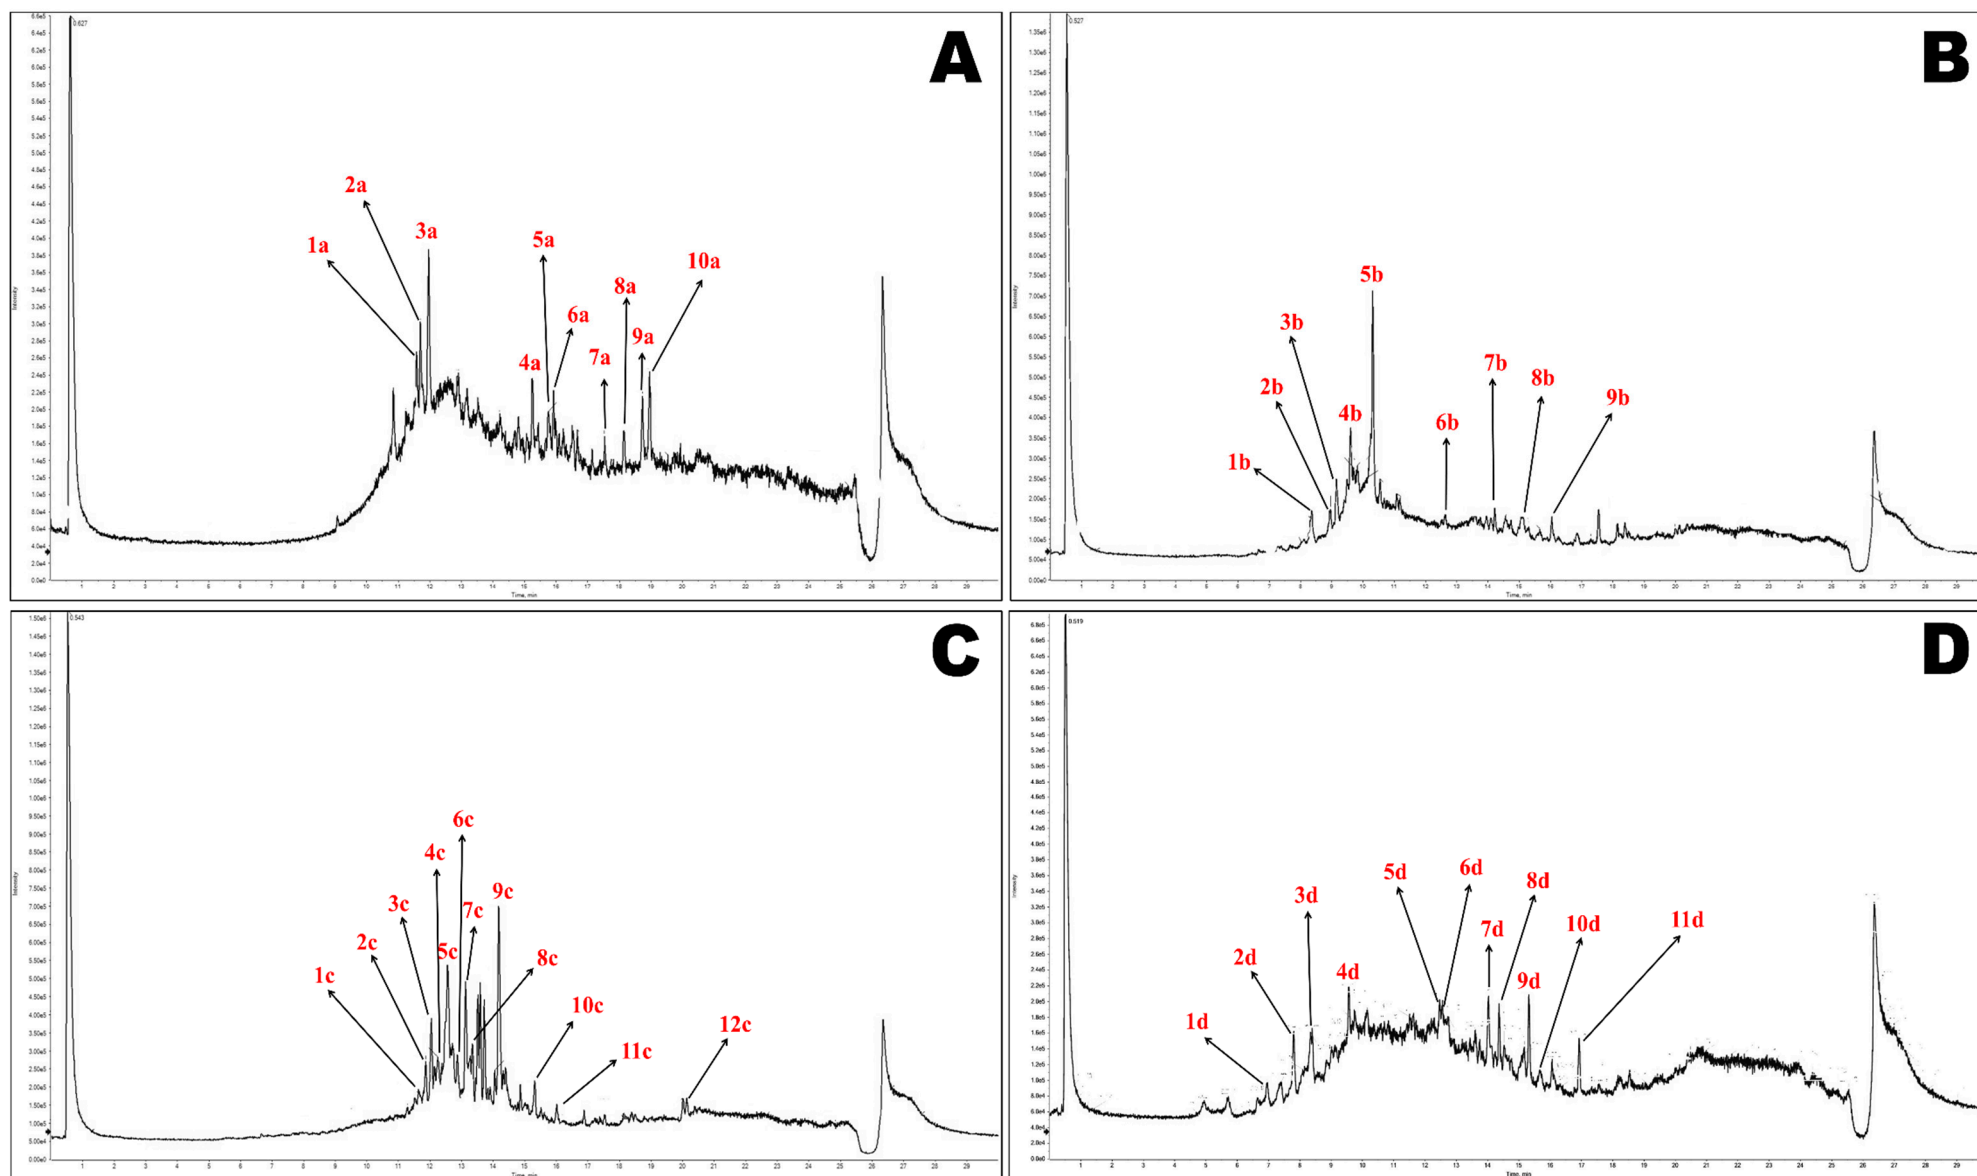

**Figure S2.** FTIR spectra of *Aframomum citratum* (C.Pereira) K.Schum **(A)**, *Dichrostachys glomerata* (Forssk.) Chiov. **(B)**, *Tetrapleura tetraptera* (Schum. and Thonn.) Taub **(C)** and *Xylopia parviflora* Spruce **(D)** extracts.

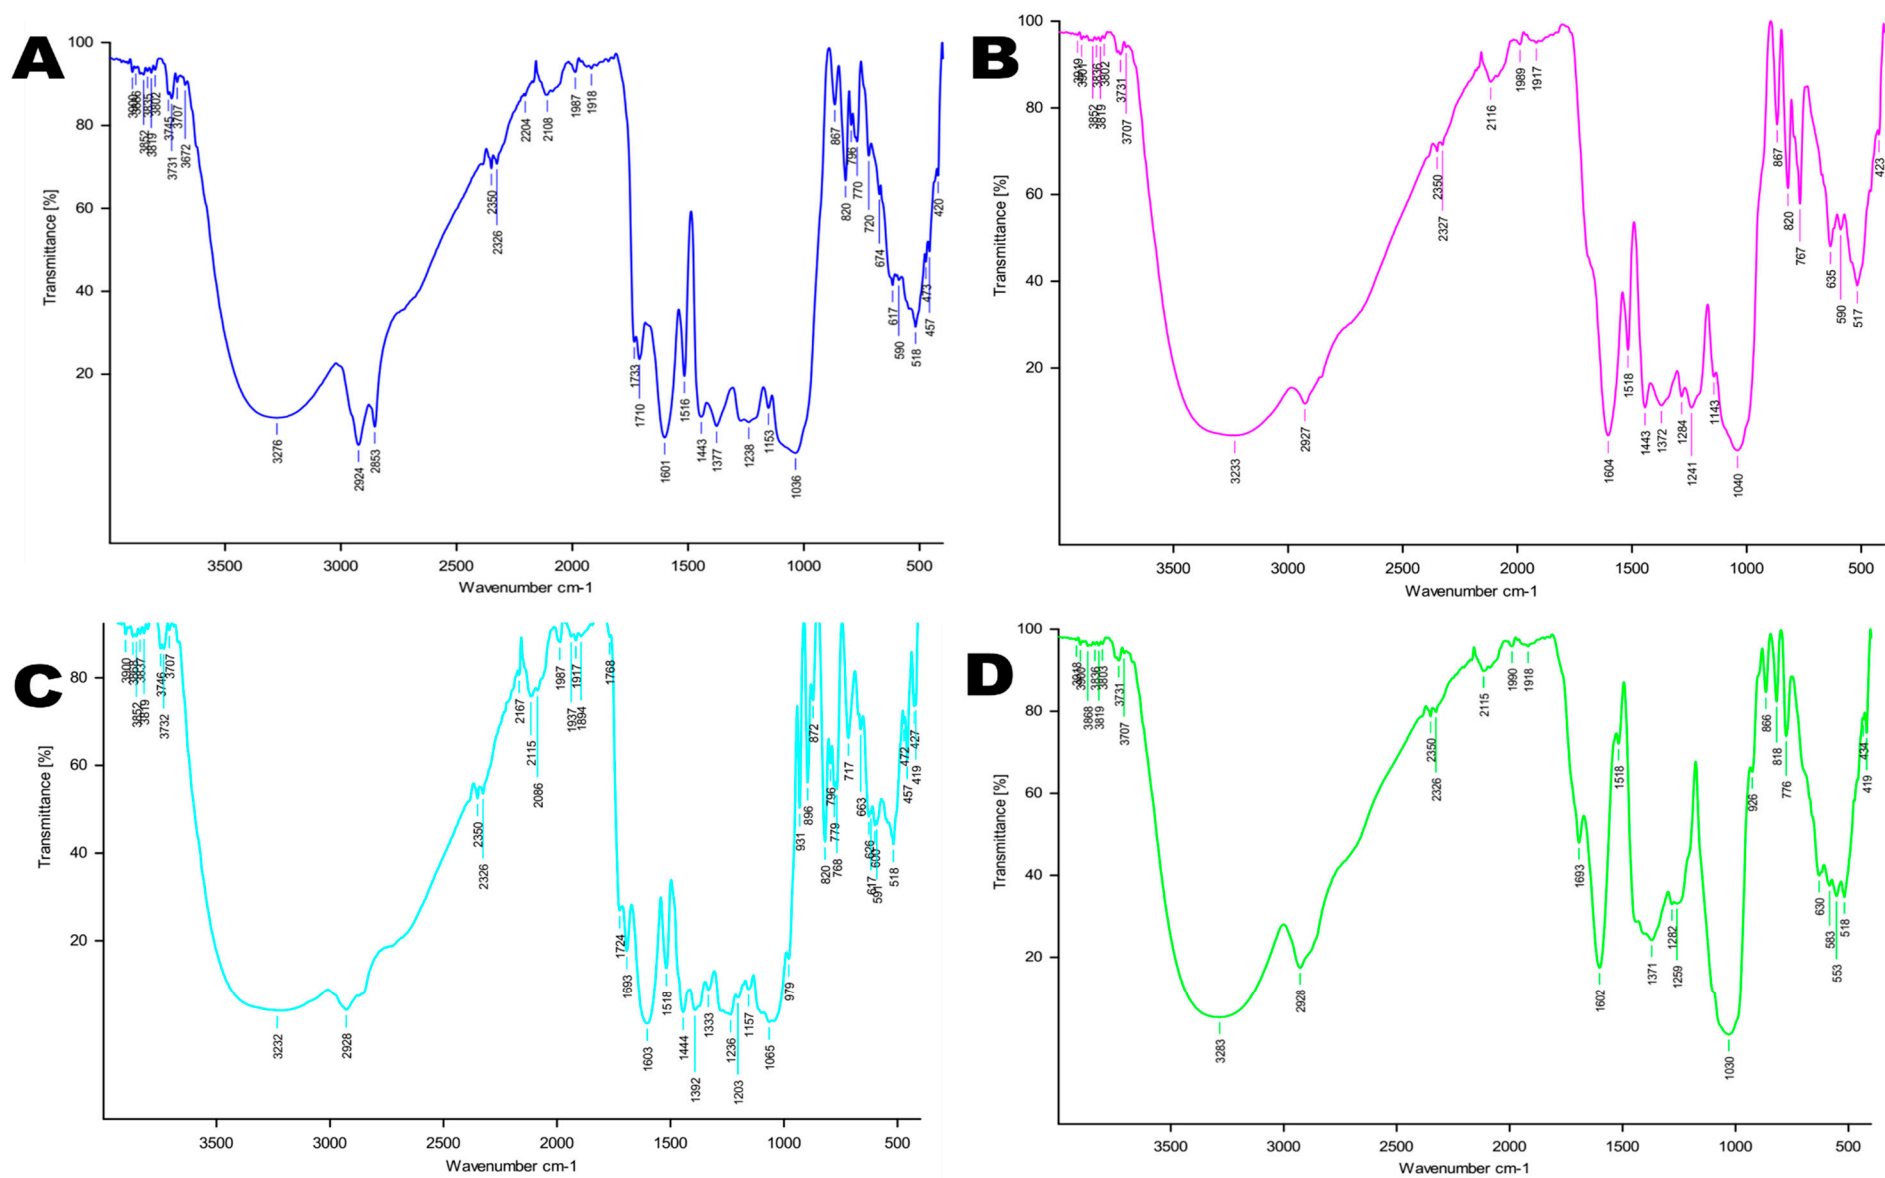

**Table S1.** Correlation coefficient (R) among the assays (antioxidant assays with phenolic compounds)

| Variables            | TPC          | TFC          | FC           | ABTS         | DPPH  | Protocatecheuic acid | Epicatechin | Catechin  | Caffeic acid | p-Coumaric acid | Rosmarinic acid | Kaempferol |
|----------------------|--------------|--------------|--------------|--------------|-------|----------------------|-------------|-----------|--------------|-----------------|-----------------|------------|
| TPC                  | 1            |              |              |              |       |                      |             |           |              |                 |                 |            |
| TFC                  | <b>0.99*</b> | 1            |              |              |       |                      |             |           |              |                 |                 |            |
| FC                   | 0.30         | 0.41         | 1            |              |       |                      |             |           |              |                 |                 |            |
| ABTS                 | <b>0.97*</b> | <b>0.99*</b> | -0.54        | 1            |       |                      |             |           |              |                 |                 |            |
| DPPH                 | <b>0.97*</b> | <b>0.96*</b> | -0.44        | <b>0.97*</b> | 1     |                      |             |           |              |                 |                 |            |
| Protocatecheuic acid | -0.66        | -0.68        | 0.06         | 0.58         | 0.46  | 1                    |             |           |              |                 |                 |            |
| Epicatechin          | 0.52         | 0.41         | -0.59        | -0.29        | -0.45 | -0.33                | 1           |           |              |                 |                 |            |
| Catechin             | 0.52         | 0.41         | -0.59        | -0.29        | -0.45 | -0.33                | <b>1*</b>   | 1         |              |                 |                 |            |
| Caffeic acid         | 0.52         | 0.41         | -0.59        | -0.29        | -0.45 | -0.33                | <b>1*</b>   | <b>1*</b> | 1            |                 |                 |            |
| p-Coumaric acid      | 0.39         | 0.48         | <b>0.99*</b> | -0.61        | -0.54 | 0.05                 | -0.49       | -0.49     | -0.49        | 1               |                 |            |
| Rosmarinic acid      | 0.51         | 0.60         | <b>0.97*</b> | -0.71        | -0.62 | -0.13                | -0.42       | -0.42     | -0.42        | <b>0.98*</b>    | 1               |            |
| Kaempferol           | -0.75        | -0.76        | 0.01         | 0.67         | 0.57  | <b>0.99*</b>         | -0.39       | -0.39     | -0.39        | -0.01           | -0.18           | 1          |

(\*): Significant ( $p < 0.05$ ) between variables. **ABTS**: 2,2'-azinobis-(3-ethylbenzothiazoline-6-sulfonic acid); **DPPH**: 1,1-Diphenyl-2-picryl-hydrazyl; **FC**: Flavonol content; **TPC**: Total phenol content; **TFC**: Total flavonoid content.

**Figure S3.** Principal component analysis (PCA) of the antioxidant assays, phenolic acids and flavonoids determined by HPLC-PDA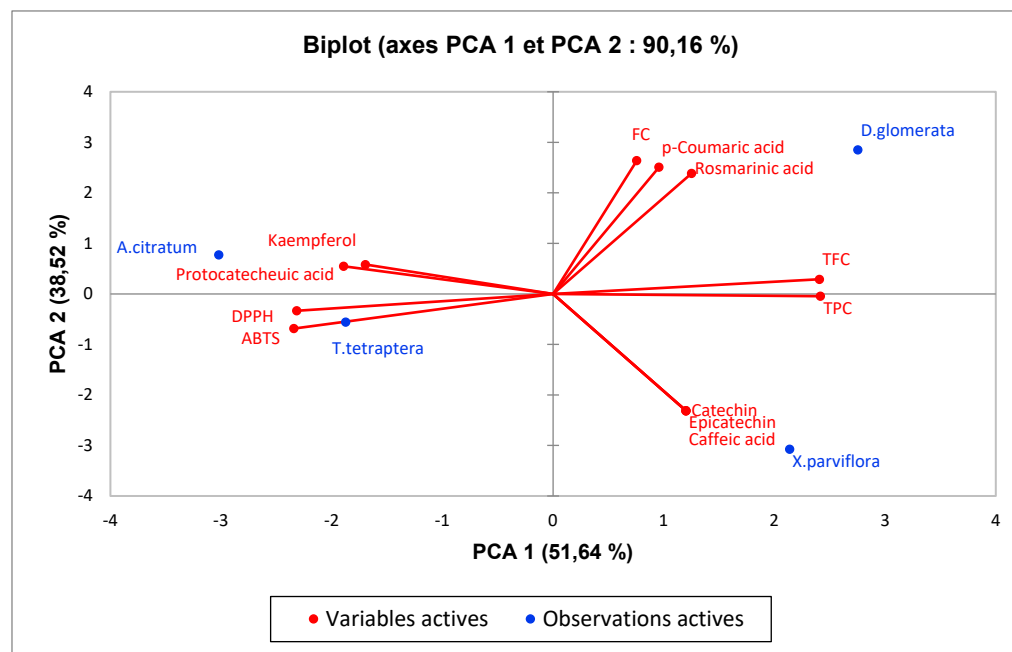

**Figure S4.** Microscopy (inverted phase contrast microscopy; 10X magnification) representation of human normal gastric (GES-1) cells **(A)** gastric adenocarcinoma (AGS) **(B)** epithelial cells.

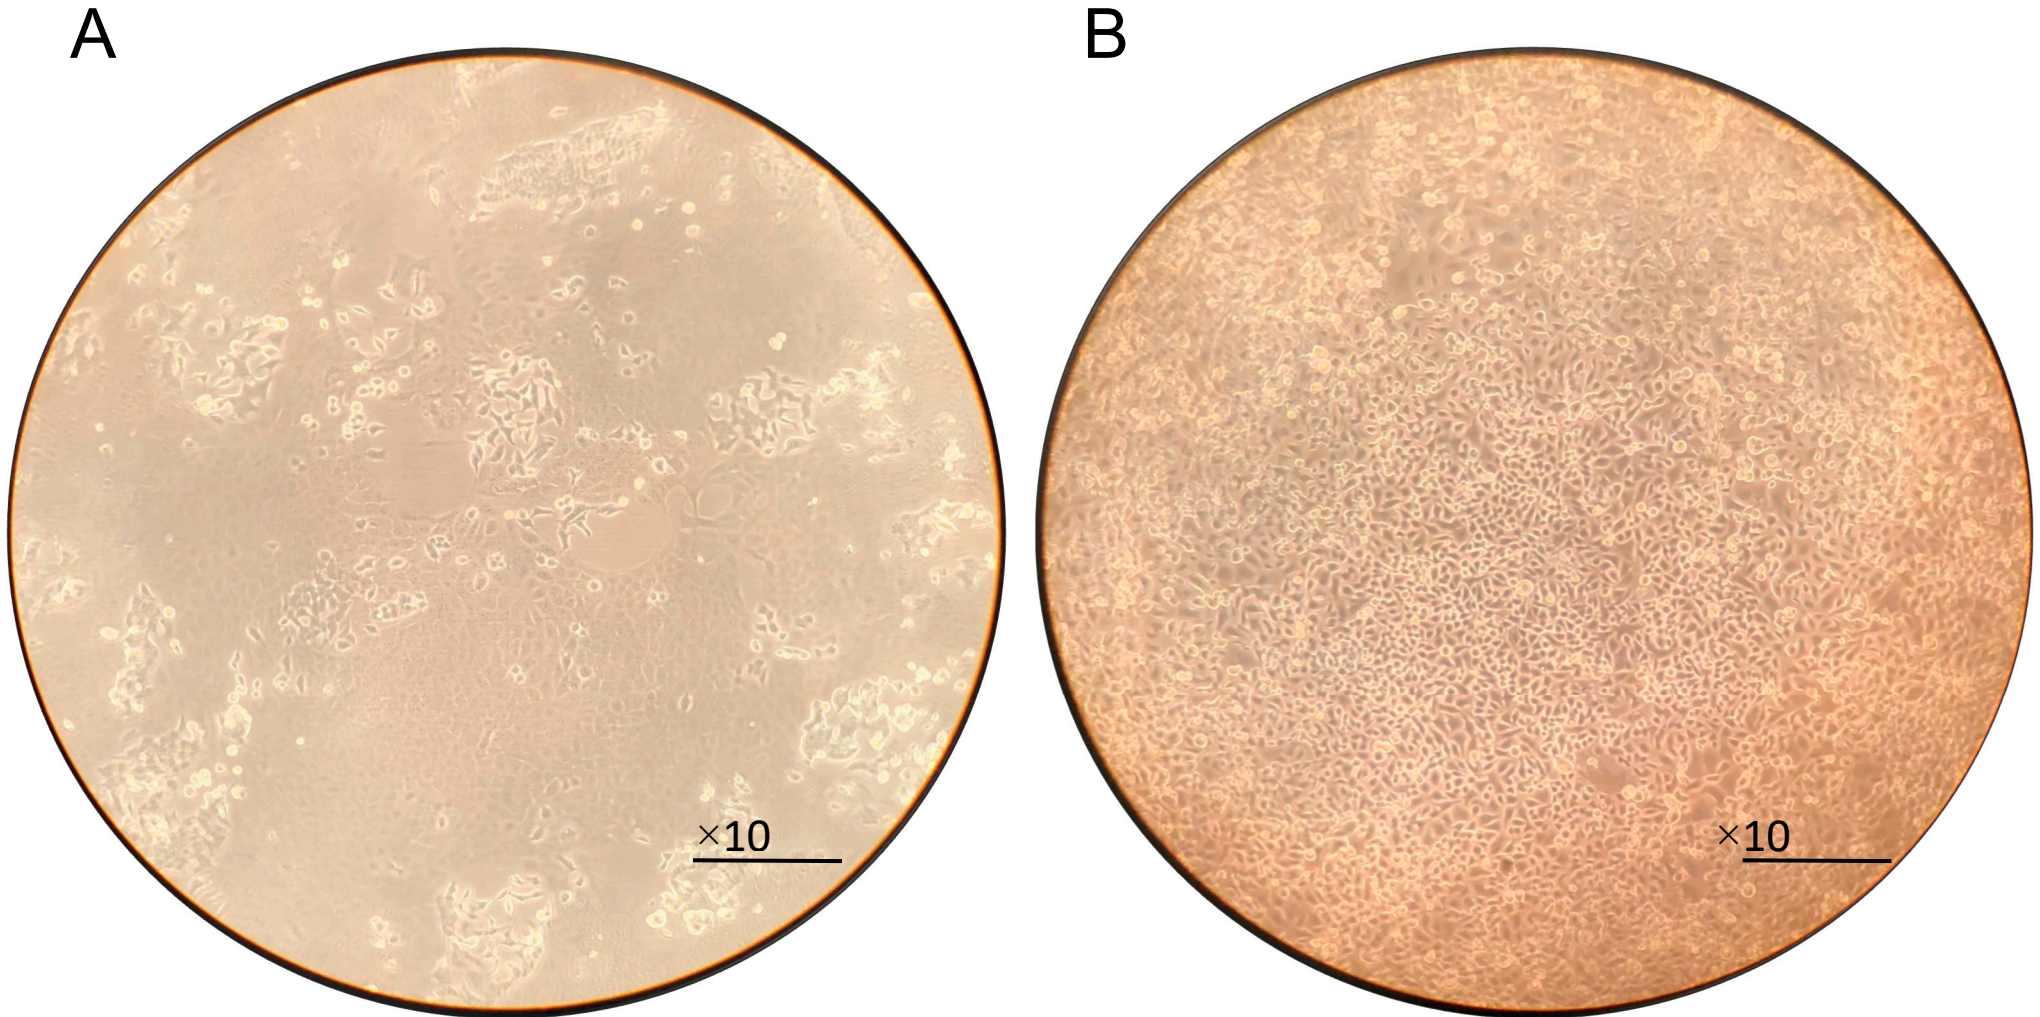

**Figure S5.** Effect of extracts in monotherapy and combination on the basal level of NF- $\kappa$ B-driven transcription in non-stimulated human gastric adenocarcinoma (AGS) and gastric epithelial (GES-1) cells.

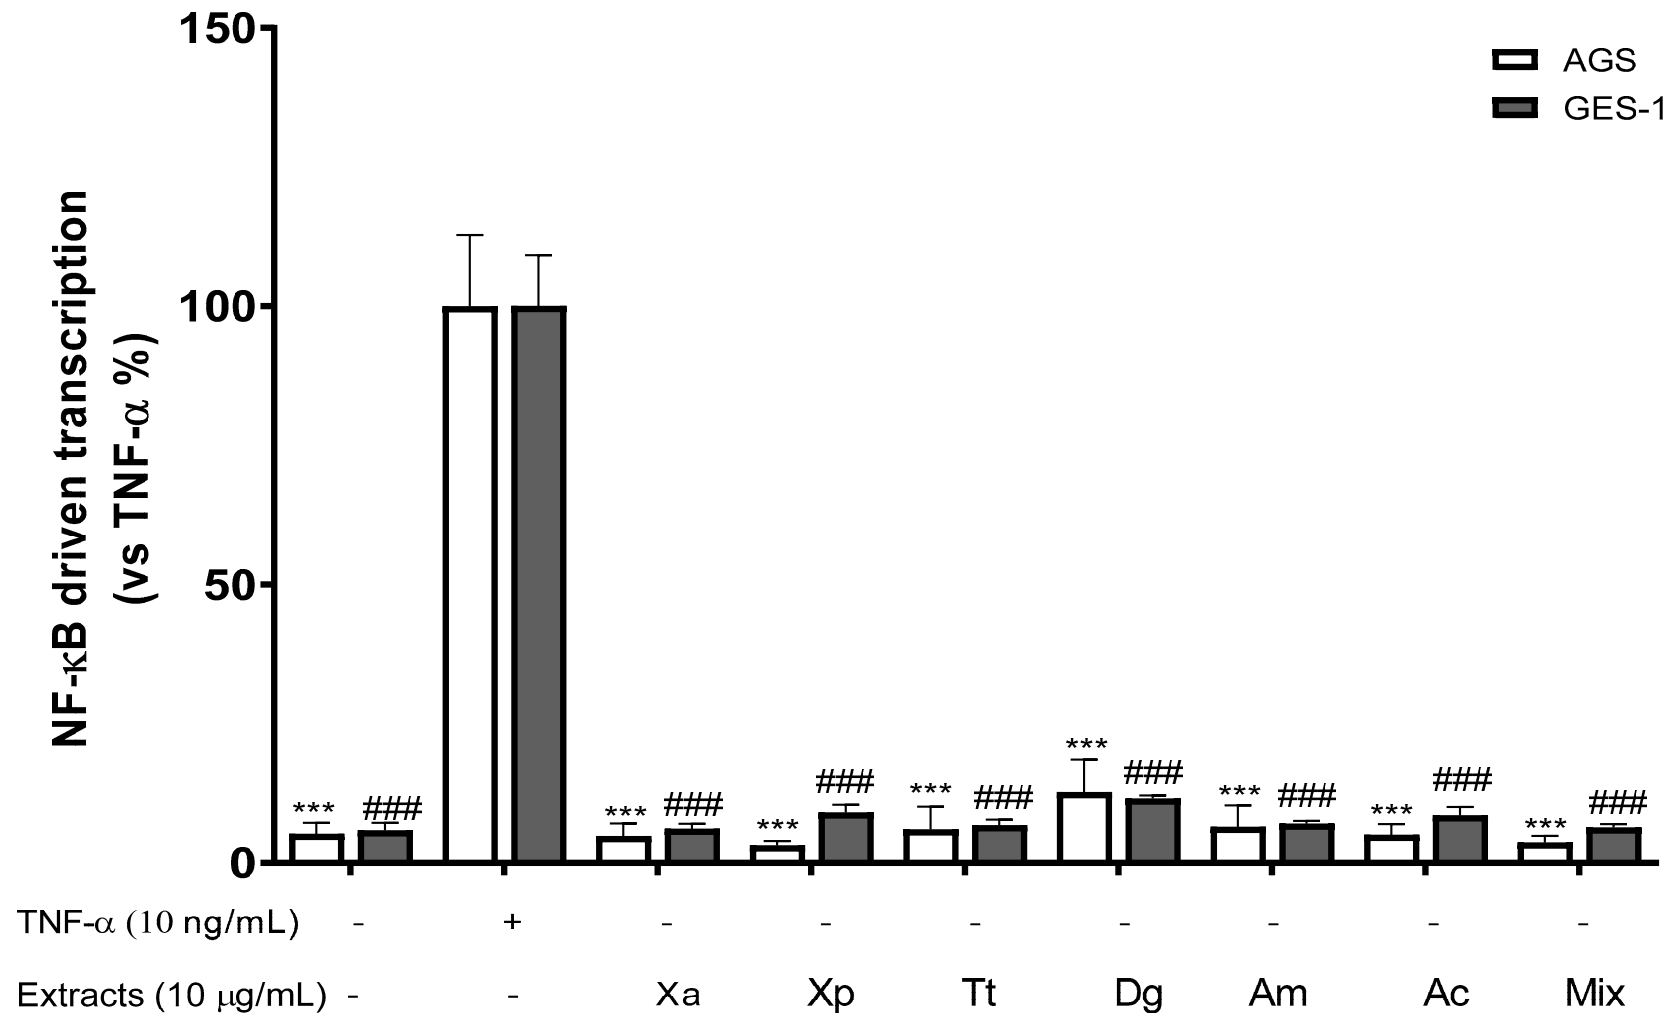

Data are expressed as percentages versus the stimulated control, which is arbitrarily set to 100%. \*  $p < 0.05$ ; \*\*  $p < 0.01$ ; \*\*\*  $p < 0.001$  in AGS cells and # $p < 0.05$ , ## $p < 0.01$  and ### $p < 0.001$  in GES-1 cells.
